# Supplementary material for: Study of Effective Corridor Design to Improve Wayfinding in Underground Malls
Source: Front Psychol. 2021 Aug 2;12:631531. doi: 10.3389/fpsyg.2021.631531 (PMC8364955; doi:10.3389/fpsyg.2021.631531)
Supplement: Supplementary file 1 [file Data_Sheet_1.xlsx]

## Sheet: Sheet2
Number	walking direction	Time spent (s)	Performance level	Right turn Performance (T)	walking direction	Time spent(s)	Performance level	Right turn Performance (a)	walking direction	Time spent(s)	Performance level	Right turn Performance (b)	walking direction	Time spent(s)	Performance level	Right turn Performance (c)	walking direction	Time spent(s)	Performance level	Right turn Performance (d)	walking direction	Time spent(s)	Performance level	Right turn Performance (e)	walking direction	Time spent(s)	Performance level	Right turn Performance (f)	walking direction	Time spent(s)	Performance level	Right turn Performance (g)	walking direction	Time spent(s)	Performance level	Right turn Performance (h)	walking direction	Time spent(s)	Performance level	Right turn Performance (i)	walking direction	Time spent(s)	Performance level	Right turn Performance (j)
1	0	9.45	0.73245	0.73245	0	7.575	0.816825	0.816825	1	6.975	0.843825	0.156175	1	6.45	0.86745	0.13255	1	5.775	0.897825	0.102175	0	7.875	0.803325	0.803325	1	9.3	0.7392	0.2608	0	5.925	0.891075	0.891075	0	9.225	0.742575	0.742575	0	5.85	0.89445	0.89445	1	11.63	0.63435	0.36565
2	0	7.65	0.81345	0.81345	0	5.1	0.9282	0.9282	1	4.875	0.938325	0.061675	1	3.975	0.978825	0.021175	1	3.825	0.985575	0.014425	1	5.325	0.918075	0.081925	0	4.725	0.945075	0.945075	0	3.375	1.00582	1.00582	0	5.175	0.924825	0.924825	0	3.3	1.0092	1.0092	1	8.21	0.78825	0.21175
3	1	10.8	0.6717	0.3283	0	8.175	0.789825	0.789825	1	7.65	0.81345	0.18655	1	6.3	0.8742	0.1258	1	6.3	0.8742	0.1258	0	8.475	0.776325	0.776325	1	10.65	0.67845	0.32155	0	6.525	0.864075	0.864075	0	9.075	0.749325	0.749325	0	6.45	0.86745	0.86745	1	6.225	0.877575	0.122425
4	0	7.35	0.82695	0.82695	0	6.225	0.877575	0.877575	1	5.7	0.9012	0.0988	1	5.1	0.9282	0.0718	1	4.425	0.958575	0.041425	0	6.525	0.864075	0.864075	0	7.2	0.8337	0.8337	0	4.575	0.951825	0.951825	0	6.375	0.870825	0.870825	0	4.5	0.9552	0.9552	1	8.47	0.77655	0.22345
5	0	8.7	0.7662	0.7662	0	6.075	0.884325	0.884325	1	5.7	0.9012	0.0988	1	5.025	0.931575	0.068425	1	4.2	0.9687	0.0313	1	6.375	0.870825	0.129175	0	5.4	0.9147	0.9147	0	4.425	0.958575	0.958575	1	6.225	0.877575	0.122425	0	4.35	0.96195	0.96195	1	4.125	0.972075	0.027925
6	0	13.275	0.560325	0.560325	0	12.6	0.5907	0.5907	1	10.8	0.6717	0.3283	1	11.55	0.63795	0.36205	1	9.975	0.708825	0.291175	0	12.975	0.573825	0.573825	1	13.8	0.5367	0.4633	0	11.025	0.661575	0.661575	0	11.325	0.648075	0.648075	0	10.95	0.66495	0.66495	1	10.725	0.675075	0.324925
7	1	10.8	0.6717	0.3283	0	8.925	0.756075	0.756075	1	9.525	0.729075	0.270925	1	7.125	0.837075	0.162925	1	6.3	0.8742	0.1258	0	8.475	0.776325	0.776325	0	4.725	0.945075	0.945075	0	6.525	0.864075	0.864075	0	8.325	0.783075	0.783075	0	6.45	0.86745	0.86745	1	6.225	0.877575	0.122425
8	1	8.4	0.7797	0.2203	0	8.4	0.7797	0.7797	1	8.1	0.7932	0.2068	1	7.2	0.8337	0.1663	1	6.45	0.86745	0.13255	0	8.625	0.769575	0.769575	1	12.3	0.6042	0.3958	0	6.675	0.857325	0.857325	0	7.725	0.810075	0.810075	0	6.6	0.8607	0.8607	1	6.375	0.870825	0.129175
9	1	12.45	0.59745	0.40255	0	9.825	0.715575	0.715575	1	9.3	0.7392	0.2608	1	9.375	0.735825	0.264175	1	8.025	0.796575	0.203425	0	10.125	0.702075	0.702075	0	8.7	0.7662	0.7662	0	8.175	0.789825	0.789825	0	9.975	0.708825	0.708825	0	8.1	0.7932	0.7932	1	12.18	0.6096	0.3904
10	0	10.95	0.66495	0.66495	0	7.575	0.816825	0.816825	1	7.95	0.79995	0.20005	1	7.2	0.8337	0.1663	1	6.45	0.86745	0.13255	0	8.625	0.769575	0.769575	0	5.55	0.90795	0.90795	0	6.675	0.857325	0.857325	0	8.475	0.776325	0.776325	0	6.6	0.8607	0.8607	1	6.375	0.870825	0.129175
11	1	11.625	0.634575	0.365425	0	8.925	0.756075	0.756075	1	8.775	0.762825	0.237175	1	7.875	0.803325	0.196675	1	7.125	0.837075	0.162925	1	9.3	0.7392	0.2608	0	6.225	0.877575	0.877575	0	7.35	0.82695	0.82695	0	9.15	0.74595	0.74595	0	7.275	0.830325	0.830325	1	7.05	0.84045	0.15955
12	0	9.375	0.735825	0.735825	0	7.725	0.810075	0.810075	1	7.35	0.82695	0.17305	1	6.6	0.8607	0.1393	1	5.775	0.897825	0.102175	0	8.025	0.796575	0.796575	0	5.1	0.9282	0.9282	0	6.075	0.884325	0.884325	0	7.875	0.803325	0.803325	0	6	0.8877	0.8877	1	5.775	0.897825	0.102175
13	1	13.95	0.52995	0.47005	0	12.225	0.607575	0.607575	1	12.375	0.600825	0.399175	1	11.7	0.6312	0.3688	1	10.95	0.66495	0.33505	0	13.125	0.567075	0.567075	1	12.9	0.5772	0.4228	0	11.175	0.654825	0.654825	0	12.975	0.573825	0.573825	0	11.1	0.6582	0.6582	1	10.875	0.668325	0.331675
14	0	12.45	0.59745	0.59745	1	9.825	0.715575	0.284425	1	9.525	0.729075	0.270925	1	8.7	0.7662	0.2338	1	7.95	0.79995	0.20005	1	10.125	0.702075	0.297925	0	6.375	0.870825	0.870825	0	8.175	0.789825	0.789825	1	9.975	0.708825	0.291175	0	8.1	0.7932	0.7932	1	7.875	0.803325	0.196675
15	1	9.15	0.74595	0.25405	0	10.35	0.69195	0.69195	1	8.4	0.7797	0.2203	1	7.65	0.81345	0.18655	1	6.9	0.8472	0.1528	0	9.075	0.749325	0.749325	0	5.55	0.90795	0.90795	0	7.125	0.837075	0.837075	0	8.925	0.756075	0.756075	0	7.05	0.84045	0.84045	1	6.825	0.850575	0.149425
16	0	6.825	0.850575	0.850575	1	6.3	0.8742	0.1258	1	6.075	0.884325	0.115675	1	6.075	0.884325	0.115675	1	4.575	0.951825	0.048175	0	6.75	0.85395	0.85395	0	6.075	0.884325	0.884325	0	4.8	0.9417	0.9417	0	6.6	0.8607	0.8607	0	4.725	0.945075	0.945075	1	4.65	0.94845	0.05155
17	1	12.225	0.607575	0.392425	0	8.775	0.762825	0.762825	1	9.15	0.74595	0.25405	1	9.15	0.74595	0.25405	1	8.55	0.77295	0.22705	0	10.65	0.67845	0.67845	1	13.425	0.553575	0.446425	0	8.7	0.7662	0.7662	0	10.5	0.6852	0.6852	0	8.625	0.769575	0.769575	1	8.4	0.7797	0.2203
18	0	8.7	0.7662	0.7662	0	6.15	0.88095	0.88095	1	6.45	0.86745	0.13255	1	4.95	0.93495	0.06505	1	4.125	0.972075	0.027925	1	6.375	0.870825	0.129175	0	5.55	0.90795	0.90795	0	4.425	0.958575	0.958575	0	6.225	0.877575	0.877575	0	4.35	0.96195	0.96195	1	9.24	0.7419	0.2581
19	0	9.975	0.708825	0.708825	0	7.35	0.82695	0.82695	1	6.975	0.843825	0.156175	1	6.225	0.877575	0.122425	1	6.225	0.877575	0.122425	0	7.65	0.81345	0.81345	0	4.575	0.951825	0.951825	0	5.7	0.9012	0.9012	0	7.5	0.8202	0.8202	0	5.625	0.904575	0.904575	1	5.4	0.9147	0.0853
20	0	11.925	0.621075	0.621075	0	9.525	0.729075	0.729075	1	8.925	0.756075	0.243925	1	8.175	0.789825	0.210175	1	7.425	0.823575	0.176425	0	9.6	0.7257	0.7257	0	5.775	0.897825	0.897825	0	7.65	0.81345	0.81345	0	8.7	0.7662	0.7662	0	7.575	0.816825	0.816825	1	10.52	0.6843	0.3157
21	0	9.375	0.735825	0.735825	1	6.6	0.8607	0.1393	1	6.225	0.877575	0.122425	1	4.95	0.93495	0.06505	1	4.875	0.938325	0.061675	1	7.05	0.84045	0.15955	0	6.225	0.877575	0.877575	0	5.1	0.9282	0.9282	0	6.9	0.8472	0.8472	0	5.025	0.931575	0.931575	1	4.8	0.9417	0.0583
22	1	14.625	0.499575	0.500425	0	12.15	0.61095	0.61095	1	11.625	0.634575	0.365425	1	10.875	0.668325	0.331675	1	9.3	0.7392	0.2608	0	12.3	0.6042	0.6042	1	13.725	0.540075	0.459925	0	10.35	0.69195	0.69195	0	12.15	0.61095	0.61095	0	10.275	0.695325	0.695325	1	12.75	0.58395	0.41605
23	0	9.6	0.7257	0.7257	0	6.9	0.8472	0.8472	1	6.675	0.857325	0.142675	1	5.925	0.891075	0.108925	1	5.175	0.924825	0.075175	0	7.35	0.82695	0.82695	0	6.525	0.864075	0.864075	0	5.4	0.9147	0.9147	0	7.2	0.8337	0.8337	0	5.325	0.918075	0.918075	1	8.26	0.786	0.214
24	0	5.925	0.891075	0.891075	0	5.55	0.90795	0.90795	1	5.175	0.924825	0.075175	1	4.425	0.958575	0.041425	1	3.675	0.992325	0.007675	0	5.85	0.89445	0.89445	0	6.525	0.864075	0.864075	0	3.9	0.9822	0.9822	0	5.7	0.9012	0.9012	0	3.825	0.985575	0.985575	1	3.6	0.9957	0.0043
25	0	12.225	0.607575	0.607575	0	9.6	0.7257	0.7257	1	9.3	0.7392	0.2608	1	7.65	0.81345	0.18655	1	7.65	0.81345	0.18655	0	9.825	0.715575	0.715575	1	12.825	0.580575	0.419425	0	7.95	0.79995	0.79995	0	9.75	0.71895	0.71895	0	7.875	0.803325	0.803325	1	7.65	0.81345	0.18655
26	1	12.525	0.594075	0.405925	1	9.675	0.722325	0.277675	1	9.225	0.742575	0.257425	1	8.775	0.762825	0.237175	1	8.1	0.7932	0.2068	1	10.2	0.6987	0.3013	0	5.625	0.904575	0.904575	0	8.25	0.78645	0.78645	1	10.05	0.70545	0.29455	0	8.175	0.789825	0.789825	1	7.95	0.79995	0.20005
27	0	9.3	0.7392	0.7392	0	6.6	0.8607	0.8607	1	6.45	0.86745	0.13255	1	5.55	0.90795	0.09205	1	4.8	0.9417	0.0583	0	6.975	0.843825	0.843825	0	7.65	0.81345	0.81345	0	5.025	0.931575	0.931575	0	6.825	0.850575	0.850575	0	4.95	0.93495	0.93495	1	9.64	0.7239	0.2761
28	0	10.725	0.675075	0.675075	0	8.1	0.7932	0.7932	1	7.725	0.810075	0.189925	1	6.975	0.843825	0.156175	1	6.225	0.877575	0.122425	0	8.4	0.7797	0.7797	0	10.575	0.681825	0.681825	0	6.45	0.86745	0.86745	0	8.25	0.78645	0.78645	0	6.375	0.870825	0.870825	1	6.15	0.88095	0.11905
29	1	11.625	0.634575	0.365425	0	8.925	0.756075	0.756075	1	9.375	0.735825	0.264175	1	7.875	0.803325	0.196675	1	7.05	0.84045	0.15955	0	9.3	0.7392	0.7392	1	5.475	0.911325	0.088675	0	7.35	0.82695	0.82695	0	9.9	0.7122	0.7122	0	7.275	0.830325	0.830325	1	7.05	0.84045	0.15955
30	0	6.375	0.870825	0.870825	0	5.325	0.918075	0.918075	1	5.625	0.904575	0.095425	1	5.625	0.904575	0.095425	1	4.875	0.938325	0.061675	0	6.3	0.8742	0.8742	0	9.225	0.742575	0.742575	0	4.35	0.96195	0.96195	0	6.15	0.88095	0.88095	0	4.275	0.965325	0.965325	1	4.05	0.97545	0.02455
31	0	10.725	0.675075	0.675075	0	8.1	0.7932	0.7932	1	7.875	0.803325	0.196675	1	6.975	0.843825	0.156175	1	6.15	0.88095	0.11905	0	8.4	0.7797	0.7797	0	5.55	0.90795	0.90795	0	6.45	0.86745	0.86745	0	8.25	0.78645	0.78645	0	6.375	0.870825	0.870825	1	6.15	0.88095	0.11905
32	1	9.45	0.73245	0.26755	0	12.15	0.61095	0.61095	0	11.475	0.641325	0.641325	1	10.2	0.6987	0.3013	1	10.125	0.702075	0.297925	0	13.2	0.5637	0.5637	1	13.575	0.546825	0.453175	0	11.175	0.654825	0.654825	0	12.975	0.573825	0.573825	0	11.1	0.6582	0.6582	1	10.875	0.668325	0.331675
33	1	11.7	0.6312	0.3688	0	9.825	0.715575	0.715575	1	8.7	0.7662	0.2338	0	7.95	0.79995	0.79995	0	7.2	0.8337	0.8337	1	9.375	0.735825	0.264175	0	4.8	0.9417	0.9417	0	7.425	0.823575	0.823575	0	9.225	0.742575	0.742575	0	7.35	0.82695	0.82695	1	7.125	0.837075	0.162925
34	1	10.875	0.668325	0.331675	0	8.25	0.78645	0.78645	1	7.875	0.803325	0.196675	1	7.125	0.837075	0.162925	1	6.375	0.870825	0.129175	0	8.55	0.77295	0.77295	1	9.975	0.708825	0.291175	1	6.6	0.8607	0.1393	0	8.4	0.7797	0.7797	0	6.525	0.864075	0.864075	1	6.3	0.8742	0.1258
35	1	13.2	0.5637	0.4363	1	8.325	0.783075	0.216925	1	8.1	0.7932	0.2068	1	7.2	0.8337	0.1663	1	6.525	0.864075	0.135925	0	8.625	0.769575	0.769575	0	6.3	0.8742	0.8742	0	6.675	0.857325	0.857325	1	8.475	0.776325	0.223675	0	6.6	0.8607	0.8607	1	11.63	0.63435	0.36565
36	0	12.45	0.59745	0.59745	0	7.575	0.816825	0.816825	1	7.2	0.8337	0.1663	1	6.525	0.864075	0.135925	1	5.775	0.897825	0.102175	1	7.875	0.803325	0.196675	1	5.55	0.90795	0.09205	0	5.925	0.891075	0.891075	0	7.725	0.810075	0.810075	0	5.85	0.89445	0.89445	1	5.625	0.904575	0.095425
37	0	9.15	0.74595	0.74595	0	6.525	0.864075	0.864075	1	6.375	0.870825	0.129175	1	5.4	0.9147	0.0853	1	4.65	0.94845	0.05155	0	6.825	0.850575	0.850575	0	9.45	0.73245	0.73245	0	4.875	0.938325	0.938325	0	6.675	0.857325	0.857325	0	4.8	0.9417	0.9417	1	4.575	0.951825	0.048175
38	0	6.375	0.870825	0.870825	0	5.25	0.92145	0.92145	1	5.625	0.904575	0.095425	1	4.8	0.9417	0.0583	1	4.125	0.972075	0.027925	0	6.3	0.8742	0.8742	1	10.725	0.675075	0.324925	0	4.35	0.96195	0.96195	0	6.15	0.88095	0.88095	0	4.275	0.965325	0.965325	1	10.32	0.6933	0.3067
39	0	6.975	0.843825	0.843825	0	5.85	0.89445	0.89445	0	5.475	0.911325	0.911325	1	4.725	0.945075	0.054925	1	4.125	0.972075	0.027925	0	6.15	0.88095	0.88095	0	6.825	0.850575	0.850575	0	4.2	0.9687	0.9687	0	6	0.8877	0.8877	0	4.125	0.972075	0.972075	1	9.15	0.74595	0.25405
40	1	9.525	0.729075	0.270925	0	6.9	0.8472	0.8472	1	6.525	0.864075	0.135925	1	5.775	0.897825	0.102175	1	5.025	0.931575	0.068425	0	7.2	0.8337	0.8337	1	5.625	0.904575	0.095425	0	5.25	0.92145	0.92145	0	6.3	0.8742	0.8742	0	5.175	0.924825	0.924825	1	4.95	0.93495	0.06505
41	0	7.275	0.830325	0.830325	0	5.4	0.9147	0.9147	1	4.95	0.93495	0.06505	1	5.025	0.931575	0.068425	1	3.525	0.999075	0.000925	0	5.7	0.9012	0.9012	0	6.15	0.88095	0.88095	0	3.75	0.98895	0.98895	0	5.55	0.90795	0.90795	1	3.675	0.992325	0.007675	1	4.2	0.9687	0.0313
42	0	10.65	0.67845	0.67845	0	8.025	0.796575	0.796575	1	7.575	0.816825	0.183175	1	6.9	0.8472	0.1528	1	6.15	0.88095	0.11905	1	8.325	0.783075	0.216925	1	11.625	0.634575	0.365425	0	6.375	0.870825	0.870825	0	8.175	0.789825	0.789825	0	6.3	0.8742	0.8742	1	6.075	0.884325	0.115675
43	1	10.95	0.66495	0.33505	0	8.55	0.77295	0.77295	1	8.925	0.756075	0.243925	1	7.425	0.823575	0.176425	1	7.35	0.82695	0.17305	1	9.6	0.7257	0.2743	1	11.025	0.661575	0.338425	0	7.65	0.81345	0.81345	0	9.45	0.73245	0.73245	0	7.575	0.816825	0.816825	1	7.65	0.81345	0.18655
44	0	8.7	0.7662	0.7662	0	7.575	0.816825	0.816825	1	7.2	0.8337	0.1663	1	6.525	0.864075	0.135925	1	5.7	0.9012	0.0988	0	7.875	0.803325	0.803325	1	10.05	0.70545	0.29455	0	5.925	0.891075	0.891075	1	7.725	0.810075	0.189925	0	5.85	0.89445	0.89445	1	5.625	0.904575	0.095425
45	0	9.9	0.7122	0.7122	1	8.025	0.796575	0.203425	0	6.9	0.8472	0.8472	0	6.15	0.88095	0.88095	1	5.4	0.9147	0.0853	0	7.575	0.816825	0.816825	0	5.4	0.9147	0.9147	0	5.625	0.904575	0.904575	0	7.425	0.823575	0.823575	0	5.55	0.90795	0.90795	1	5.325	0.918075	0.081925
46	0	11.1	0.6582	0.6582	0	8.475	0.776325	0.776325	1	7.875	0.803325	0.196675	1	7.35	0.82695	0.17305	1	6.6	0.8607	0.1393	1	8.775	0.762825	0.237175	1	13.2	0.5637	0.4363	0	6.825	0.850575	0.850575	0	8.625	0.769575	0.769575	0	6.75	0.85395	0.85395	1	6.525	0.864075	0.135925
47	0	5.7	0.9012	0.9012	0	5.325	0.918075	0.918075	0	5.1	0.9282	0.9282	1	4.2	0.9687	0.0313	1	4.275	0.965325	0.034675	0	5.625	0.904575	0.904575	1	10.05	0.70545	0.29455	0	3.675	0.992325	0.992325	0	5.475	0.911325	0.911325	0	3.6	0.9957	0.9957	1	3.375	1.00582	0.005825
48	0	8.775	0.762825	0.762825	1	6.15	0.88095	0.11905	1	5.775	0.897825	0.102175	1	4.95	0.93495	0.06505	1	4.275	0.965325	0.034675	1	6.45	0.86745	0.13255	0	5.625	0.904575	0.904575	0	4.5	0.9552	0.9552	0	6.3	0.8742	0.8742	0	4.425	0.958575	0.958575	0	4.2	0.9687	0.9687
49	1	10.95	0.66495	0.33505	0	9.825	0.715575	0.715575	1	7.95	0.79995	0.20005	1	7.275	0.830325	0.169675	1	6.45	0.86745	0.13255	0	8.625	0.769575	0.769575	0	6.3	0.8742	0.8742	0	6.675	0.857325	0.857325	0	7.725	0.810075	0.810075	0	6.6	0.8607	0.8607	1	6.375	0.870825	0.129175
50	0	7.2	0.8337	0.8337	0	6.075	0.884325	0.884325	1	5.7	0.9012	0.0988	0	4.95	0.93495	0.93495	1	4.2	0.9687	0.0313	1	6.375	0.870825	0.129175	0	7.05	0.84045	0.84045	0	4.425	0.958575	0.958575	0	6.225	0.877575	0.877575	0	4.35	0.96195	0.96195	1	4.125	0.972075	0.027925
51	0	10.95	0.66495	0.66495	0	9.9	0.7122	0.7122	1	7.65	0.81345	0.18655	1	7.2	0.8337	0.1663	0	6.45	0.86745	0.86745	0	8.625	0.769575	0.769575	0	9.3	0.7392	0.7392	0	6.675	0.857325	0.857325	1	8.475	0.776325	0.223675	0	6.6	0.8607	0.8607	1	6.375	0.870825	0.129175
52	0	11.55	0.63795	0.63795	0	7.35	0.82695	0.82695	0	9.075	0.749325	0.749325	1	7.8	0.8067	0.1933	1	6.225	0.877575	0.122425	1	9.225	0.742575	0.257425	0	7.65	0.81345	0.81345	0	7.275	0.830325	0.830325	0	9.075	0.749325	0.749325	1	7.2	0.8337	0.1663	0	9.14	0.7464	0.7464
53	0	10.575	0.681825	0.681825	0	8.775	0.762825	0.762825	1	8.55	0.77295	0.22705	1	7.65	0.81345	0.18655	1	6.9	0.8472	0.1528	0	9.075	0.749325	0.749325	1	11.7	0.6312	0.3688	1	7.125	0.837075	0.162925	0	8.925	0.756075	0.756075	0	7.05	0.84045	0.84045	1	6.825	0.850575	0.149425
54	0	6.375	0.870825	0.870825	0	5.925	0.891075	0.891075	1	6.6	0.8607	0.1393	1	4.875	0.938325	0.061675	1	4.125	0.972075	0.027925	0	6.3	0.8742	0.8742	1	13.05	0.57045	0.42955	0	4.35	0.96195	0.96195	1	6.15	0.88095	0.11905	0	4.275	0.965325	0.965325	1	10.63	0.67935	0.32065
55	0	5.2	0.9237	0.9237	0	4.6	0.9507	0.9507	1	4.525	0.954075	0.045925	0	4.15	0.97095	0.97095	1	3.7	0.9912	0.0088	1	4.875	0.938325	0.061675	0	4.725	0.945075	0.945075	0	3.925	0.981075	0.981075	0	4.725	0.945075	0.945075	0	3.85	0.98445	0.98445	1	8.54	0.7734	0.2266
56	1	10.2	0.6987	0.3013	0	9.825	0.715575	0.715575	1	6.45	0.86745	0.13255	1	6.525	0.864075	0.135925	1	5.775	0.897825	0.102175	0	7.875	0.803325	0.803325	0	5.55	0.90795	0.90795	0	5.925	0.891075	0.891075	0	7.725	0.810075	0.810075	0	5.85	0.89445	0.89445	1	5.625	0.904575	0.095425
57	0	9.9	0.7122	0.7122	0	8.025	0.796575	0.796575	1	7.65	0.81345	0.18655	1	6.9	0.8472	0.1528	1	6.15	0.88095	0.11905	0	8.325	0.783075	0.783075	0	6.9	0.8472	0.8472	0	6.375	0.870825	0.870825	0	8.175	0.789825	0.789825	0	6.3	0.8742	0.8742	1	10.21	0.69825	0.30175
58	0	10.2	0.6987	0.6987	0	8.4	0.7797	0.7797	1	7.125	0.837075	0.162925	1	6.375	0.870825	0.129175	1	5.7	0.9012	0.0988	0	7.875	0.803325	0.803325	0	6.3	0.8742	0.8742	0	5.925	0.891075	0.891075	0	7.725	0.810075	0.810075	0	5.85	0.89445	0.89445	1	5.625	0.904575	0.095425
59	0	5.775	0.897825	0.897825	0	6.9	0.8472	0.8472	1	7.275	0.830325	0.169675	1	6.525	0.864075	0.135925	1	5.775	0.897825	0.102175	1	7.95	0.79995	0.20005	0	11.625	0.634575	0.634575	0	6	0.8877	0.8877	0	7.8	0.8067	0.8067	0	5.925	0.891075	0.891075	1	5.7	0.9012	0.0988
60	0	7.95	0.79995	0.79995	0	6.6525	0.858337	0.858337	1	6.975	0.843825	0.156175	1	6.15	0.88095	0.11905	1	4.65	0.94845	0.05155	0	6.9	0.8472	0.8472	0	6.075	0.884325	0.884325	0	4.95	0.93495	0.93495	0	6.75	0.85395	0.85395	0	4.875	0.938325	0.938325	1	12.4	0.5997	0.4003
61	0	9.45	0.73245	0.73245	0	7.575	0.816825	0.816825	1	6.975	0.843825	0.156175	1	6.45	0.86745	0.13255	1	5.775	0.897825	0.102175	0	7.875	0.803325	0.803325	1	9.3	0.7392	0.2608	0	5.925	0.891075	0.891075	0	9.225	0.742575	0.742575	0	5.85	0.89445	0.89445	1	5.625	0.904575	0.095425
62	0	7.65	0.81345	0.81345	0	5.1	0.9282	0.9282	1	4.875	0.938325	0.061675	1	3.975	0.978825	0.021175	1	3.825	0.985575	0.014425	1	5.325	0.918075	0.081925	0	4.725	0.945075	0.945075	0	3.375	1.00582	1.00582	0	5.175	0.924825	0.924825	0	3.3	1.0092	1.0092	1	6.54	0.8634	0.1366
63	1	10.8	0.6717	0.3283	0	8.175	0.789825	0.789825	1	7.65	0.81345	0.18655	1	6.3	0.8742	0.1258	1	6.3	0.8742	0.1258	0	8.475	0.776325	0.776325	1	10.65	0.67845	0.32155	0	6.525	0.864075	0.864075	0	9.075	0.749325	0.749325	0	6.45	0.86745	0.86745	1	10.63	0.67935	0.32065
64	0	7.35	0.82695	0.82695	0	6.225	0.877575	0.877575	1	5.7	0.9012	0.0988	1	5.1	0.9282	0.0718	1	4.425	0.958575	0.041425	0	6.525	0.864075	0.864075	0	7.2	0.8337	0.8337	0	4.575	0.951825	0.951825	0	6.375	0.870825	0.870825	0	4.5	0.9552	0.9552	0	4.275	0.965325	0.965325
65	0	8.7	0.7662	0.7662	0	6.075	0.884325	0.884325	1	5.7	0.9012	0.0988	1	5.025	0.931575	0.068425	1	4.2	0.9687	0.0313	1	6.375	0.870825	0.129175	0	5.4	0.9147	0.9147	0	4.425	0.958575	0.958575	1	6.225	0.877575	0.122425	0	4.35	0.96195	0.96195	1	9.14	0.7464	0.2536
66	0	13.275	0.560325	0.560325	0	12.6	0.5907	0.5907	1	10.8	0.6717	0.3283	1	11.55	0.63795	0.36205	1	9.975	0.708825	0.291175	0	12.975	0.573825	0.573825	1	13.8	0.5367	0.4633	0	11.025	0.661575	0.661575	0	11.325	0.648075	0.648075	0	10.95	0.66495	0.66495	1	10.725	0.675075	0.324925
67	1	10.8	0.6717	0.3283	0	8.925	0.756075	0.756075	1	9.525	0.729075	0.270925	1	7.125	0.837075	0.162925	1	6.3	0.8742	0.1258	0	8.475	0.776325	0.776325	0	4.725	0.945075	0.945075	0	6.525	0.864075	0.864075	0	8.325	0.783075	0.783075	0	6.45	0.86745	0.86745	1	12.63	0.58935	0.41065
68	1	8.4	0.7797	0.2203	0	8.4	0.7797	0.7797	1	8.1	0.7932	0.2068	1	7.2	0.8337	0.1663	1	6.45	0.86745	0.13255	0	8.625	0.769575	0.769575	1	12.3	0.6042	0.3958	0	6.675	0.857325	0.857325	0	7.725	0.810075	0.810075	0	6.6	0.8607	0.8607	1	6.375	0.870825	0.129175
69	1	12.45	0.59745	0.40255	0	9.825	0.715575	0.715575	1	9.3	0.7392	0.2608	1	9.375	0.735825	0.264175	1	8.025	0.796575	0.203425	0	10.125	0.702075	0.702075	0	8.7	0.7662	0.7662	0	8.175	0.789825	0.789825	0	9.975	0.708825	0.708825	0	8.1	0.7932	0.7932	1	9.24	0.7419	0.2581
70	0	10.95	0.66495	0.66495	0	7.575	0.816825	0.816825	1	7.95	0.79995	0.20005	1	7.2	0.8337	0.1663	1	6.45	0.86745	0.13255	0	8.625	0.769575	0.769575	0	5.55	0.90795	0.90795	0	6.675	0.857325	0.857325	0	8.475	0.776325	0.776325	0	6.6	0.8607	0.8607	1	6.375	0.870825	0.129175
71	1	11.625	0.634575	0.365425	0	8.925	0.756075	0.756075	1	8.775	0.762825	0.237175	1	7.875	0.803325	0.196675	1	7.125	0.837075	0.162925	1	9.3	0.7392	0.2608	0	6.225	0.877575	0.877575	0	7.35	0.82695	0.82695	0	9.15	0.74595	0.74595	0	7.275	0.830325	0.830325	1	7.05	0.84045	0.15955
72	0	9.375	0.735825	0.735825	0	7.725	0.810075	0.810075	1	7.35	0.82695	0.17305	1	6.6	0.8607	0.1393	1	5.775	0.897825	0.102175	0	8.025	0.796575	0.796575	0	5.1	0.9282	0.9282	0	6.075	0.884325	0.884325	0	7.875	0.803325	0.803325	0	6	0.8877	0.8877	1	5.775	0.897825	0.102175
73	1	13.95	0.52995	0.47005	0	12.225	0.607575	0.607575	1	12.375	0.600825	0.399175	1	11.7	0.6312	0.3688	1	10.95	0.66495	0.33505	0	13.125	0.567075	0.567075	1	12.9	0.5772	0.4228	0	11.175	0.654825	0.654825	0	12.975	0.573825	0.573825	0	11.1	0.6582	0.6582	1	10.875	0.668325	0.331675
74	0	12.45	0.59745	0.59745	1	9.825	0.715575	0.284425	1	9.525	0.729075	0.270925	1	8.7	0.7662	0.2338	1	7.95	0.79995	0.20005	1	10.125	0.702075	0.297925	0	6.375	0.870825	0.870825	0	8.175	0.789825	0.789825	1	9.975	0.708825	0.291175	0	8.1	0.7932	0.7932	1	7.875	0.803325	0.196675
75	1	9.15	0.74595	0.25405	0	10.35	0.69195	0.69195	1	8.4	0.7797	0.2203	1	7.65	0.81345	0.18655	1	6.9	0.8472	0.1528	0	9.075	0.749325	0.749325	0	5.55	0.90795	0.90795	0	7.125	0.837075	0.837075	0	8.925	0.756075	0.756075	0	7.05	0.84045	0.84045	1	6.825	0.850575	0.149425
76	0	6.825	0.850575	0.850575	1	6.3	0.8742	0.1258	1	6.075	0.884325	0.115675	1	6.075	0.884325	0.115675	1	4.575	0.951825	0.048175	0	6.75	0.85395	0.85395	0	6.075	0.884325	0.884325	0	4.8	0.9417	0.9417	0	6.6	0.8607	0.8607	0	4.725	0.945075	0.945075	1	8.41	0.77925	0.22075
77	1	12.225	0.607575	0.392425	0	8.775	0.762825	0.762825	1	9.15	0.74595	0.25405	1	9.15	0.74595	0.25405	1	8.55	0.77295	0.22705	0	10.65	0.67845	0.67845	1	13.425	0.553575	0.446425	0	8.7	0.7662	0.7662	0	10.5	0.6852	0.6852	0	8.625	0.769575	0.769575	1	8.4	0.7797	0.2203
78	0	8.7	0.7662	0.7662	0	6.15	0.88095	0.88095	1	6.45	0.86745	0.13255	1	4.95	0.93495	0.06505	1	4.125	0.972075	0.027925	1	6.375	0.870825	0.129175	0	5.55	0.90795	0.90795	0	4.425	0.958575	0.958575	0	6.225	0.877575	0.877575	0	4.35	0.96195	0.96195	1	8.64	0.7689	0.2311
79	0	9.975	0.708825	0.708825	0	7.35	0.82695	0.82695	1	6.975	0.843825	0.156175	1	6.225	0.877575	0.122425	1	6.225	0.877575	0.122425	0	7.65	0.81345	0.81345	0	4.575	0.951825	0.951825	0	5.7	0.9012	0.9012	0	7.5	0.8202	0.8202	0	5.625	0.904575	0.904575	1	5.4	0.9147	0.0853
80	0	11.925	0.621075	0.621075	0	9.525	0.729075	0.729075	1	8.925	0.756075	0.243925	1	8.175	0.789825	0.210175	1	7.425	0.823575	0.176425	0	9.6	0.7257	0.7257	0	5.775	0.897825	0.897825	0	7.65	0.81345	0.81345	0	8.7	0.7662	0.7662	0	7.575	0.816825	0.816825	1	7.35	0.82695	0.17305
81	0	9.375	0.735825	0.735825	1	6.6	0.8607	0.1393	1	6.225	0.877575	0.122425	1	4.95	0.93495	0.06505	1	4.875	0.938325	0.061675	1	7.05	0.84045	0.15955	0	6.225	0.877575	0.877575	0	5.1	0.9282	0.9282	0	6.9	0.8472	0.8472	0	5.025	0.931575	0.931575	1	7.45	0.82245	0.17755
82	1	14.625	0.499575	0.500425	0	12.15	0.61095	0.61095	1	11.625	0.634575	0.365425	1	10.875	0.668325	0.331675	1	9.3	0.7392	0.2608	0	12.3	0.6042	0.6042	1	13.725	0.540075	0.459925	0	10.35	0.69195	0.69195	0	12.15	0.61095	0.61095	0	10.275	0.695325	0.695325	1	10.05	0.70545	0.29455
83	0	9.6	0.7257	0.7257	0	6.9	0.8472	0.8472	1	6.675	0.857325	0.142675	1	5.925	0.891075	0.108925	1	5.175	0.924825	0.075175	0	7.35	0.82695	0.82695	0	6.525	0.864075	0.864075	0	5.4	0.9147	0.9147	0	7.2	0.8337	0.8337	0	5.325	0.918075	0.918075	1	8.24	0.7869	0.2131
84	0	5.925	0.891075	0.891075	0	5.55	0.90795	0.90795	1	5.175	0.924825	0.075175	1	4.425	0.958575	0.041425	1	3.675	0.992325	0.007675	0	5.85	0.89445	0.89445	0	6.525	0.864075	0.864075	0	3.9	0.9822	0.9822	0	5.7	0.9012	0.9012	0	3.825	0.985575	0.985575	1	8.14	0.7914	0.2086
85	0	12.225	0.607575	0.607575	0	9.6	0.7257	0.7257	1	9.3	0.7392	0.2608	1	7.65	0.81345	0.18655	1	7.65	0.81345	0.18655	0	9.825	0.715575	0.715575	1	12.825	0.580575	0.419425	0	7.95	0.79995	0.79995	0	9.75	0.71895	0.71895	0	7.875	0.803325	0.803325	1	8.14	0.7914	0.2086
86	1	12.525	0.594075	0.405925	1	9.675	0.722325	0.277675	1	9.225	0.742575	0.257425	1	8.775	0.762825	0.237175	1	8.1	0.7932	0.2068	1	10.2	0.6987	0.3013	0	5.625	0.904575	0.904575	0	8.25	0.78645	0.78645	1	10.05	0.70545	0.29455	0	8.175	0.789825	0.789825	0	9.14	0.7464	0.7464
87	0	9.3	0.7392	0.7392	0	6.6	0.8607	0.8607	1	6.45	0.86745	0.13255	1	5.55	0.90795	0.09205	1	4.8	0.9417	0.0583	0	6.975	0.843825	0.843825	0	7.65	0.81345	0.81345	0	5.025	0.931575	0.931575	0	6.825	0.850575	0.850575	0	4.95	0.93495	0.93495	1	5.12	0.9273	0.0727
88	0	10.725	0.675075	0.675075	0	8.1	0.7932	0.7932	1	7.725	0.810075	0.189925	1	6.975	0.843825	0.156175	1	6.225	0.877575	0.122425	0	8.4	0.7797	0.7797	0	10.575	0.681825	0.681825	0	6.45	0.86745	0.86745	0	8.25	0.78645	0.78645	0	6.375	0.870825	0.870825	1	10.2	0.6987	0.3013
89	1	11.625	0.634575	0.365425	0	8.925	0.756075	0.756075	1	9.375	0.735825	0.264175	1	7.875	0.803325	0.196675	1	7.05	0.84045	0.15955	0	9.3	0.7392	0.7392	1	5.475	0.911325	0.088675	0	7.35	0.82695	0.82695	0	9.9	0.7122	0.7122	0	7.275	0.830325	0.830325	1	9.64	0.7239	0.2761
90	0	6.375	0.870825	0.870825	0	5.325	0.918075	0.918075	1	5.625	0.904575	0.095425	1	5.625	0.904575	0.095425	1	4.875	0.938325	0.061675	0	6.3	0.8742	0.8742	0	9.225	0.742575	0.742575	0	4.35	0.96195	0.96195	0	6.15	0.88095	0.88095	0	4.275	0.965325	0.965325	1	5.34	0.9174	0.0826
91	0	10.725	0.675075	0.675075	0	8.1	0.7932	0.7932	1	7.875	0.803325	0.196675	1	6.975	0.843825	0.156175	1	6.15	0.88095	0.11905	0	8.4	0.7797	0.7797	0	5.55	0.90795	0.90795	0	6.45	0.86745	0.86745	0	8.25	0.78645	0.78645	0	6.375	0.870825	0.870825	1	6.15	0.88095	0.11905
92	1	9.45	0.73245	0.26755	0	12.15	0.61095	0.61095	0	11.475	0.641325	0.641325	1	10.2	0.6987	0.3013	1	10.125	0.702075	0.297925	0	13.2	0.5637	0.5637	1	13.575	0.546825	0.453175	0	11.175	0.654825	0.654825	0	12.975	0.573825	0.573825	0	11.1	0.6582	0.6582	1	10.875	0.668325	0.331675
93	1	11.7	0.6312	0.3688	0	9.825	0.715575	0.715575	1	8.7	0.7662	0.2338	0	7.95	0.79995	0.79995	0	7.2	0.8337	0.8337	1	9.375	0.735825	0.264175	0	4.8	0.9417	0.9417	0	7.425	0.823575	0.823575	0	9.225	0.742575	0.742575	0	7.35	0.82695	0.82695	1	7.125	0.837075	0.162925
94	1	10.875	0.668325	0.331675	0	8.25	0.78645	0.78645	1	7.875	0.803325	0.196675	1	7.125	0.837075	0.162925	1	6.375	0.870825	0.129175	0	8.55	0.77295	0.77295	1	9.975	0.708825	0.291175	1	6.6	0.8607	0.1393	0	8.4	0.7797	0.7797	0	6.525	0.864075	0.864075	1	6.3	0.8742	0.1258
95	1	13.2	0.5637	0.4363	1	8.325	0.783075	0.216925	1	8.1	0.7932	0.2068	1	7.2	0.8337	0.1663	1	6.525	0.864075	0.135925	0	8.625	0.769575	0.769575	0	6.3	0.8742	0.8742	0	6.675	0.857325	0.857325	1	8.475	0.776325	0.223675	0	6.6	0.8607	0.8607	1	6.375	0.870825	0.129175
96	0	12.45	0.59745	0.59745	0	7.575	0.816825	0.816825	1	7.2	0.8337	0.1663	1	6.525	0.864075	0.135925	1	5.775	0.897825	0.102175	1	7.875	0.803325	0.196675	1	5.55	0.90795	0.09205	0	5.925	0.891075	0.891075	0	7.725	0.810075	0.810075	0	5.85	0.89445	0.89445	1	11.6	0.6357	0.3643
97	0	9.15	0.74595	0.74595	0	6.525	0.864075	0.864075	1	6.375	0.870825	0.129175	1	5.4	0.9147	0.0853	1	4.65	0.94845	0.05155	0	6.825	0.850575	0.850575	0	9.45	0.73245	0.73245	0	4.875	0.938325	0.938325	0	6.675	0.857325	0.857325	0	4.8	0.9417	0.9417	1	9.21	0.74325	0.25675
98	0	6.375	0.870825	0.870825	0	5.25	0.92145	0.92145	1	5.625	0.904575	0.095425	1	4.8	0.9417	0.0583	1	4.125	0.972075	0.027925	0	6.3	0.8742	0.8742	1	10.725	0.675075	0.324925	0	4.35	0.96195	0.96195	0	6.15	0.88095	0.88095	0	4.275	0.965325	0.965325	0	7.12	0.8373	0.8373
99	0	6.975	0.843825	0.843825	0	5.85	0.89445	0.89445	0	5.475	0.911325	0.911325	1	4.725	0.945075	0.054925	1	4.125	0.972075	0.027925	0	6.15	0.88095	0.88095	0	6.825	0.850575	0.850575	0	4.2	0.9687	0.9687	0	6	0.8877	0.8877	0	4.125	0.972075	0.972075	1	8.61	0.77025	0.22975
100	1	9.525	0.729075	0.270925	0	6.9	0.8472	0.8472	1	6.525	0.864075	0.135925	1	5.775	0.897825	0.102175	1	5.025	0.931575	0.068425	0	7.2	0.8337	0.8337	1	5.625	0.904575	0.095425	0	5.25	0.92145	0.92145	0	6.3	0.8742	0.8742	0	5.175	0.924825	0.924825	1	10.2	0.6987	0.3013
101	0	7.275	0.830325	0.830325	0	5.4	0.9147	0.9147	1	4.95	0.93495	0.06505	1	5.025	0.931575	0.068425	1	3.525	0.999075	0.000925	0	5.7	0.9012	0.9012	0	6.15	0.88095	0.88095	0	3.75	0.98895	0.98895	0	5.55	0.90795	0.90795	1	3.675	0.992325	0.007675	0	4.2	0.9687	0.9687
102	0	10.65	0.67845	0.67845	0	8.025	0.796575	0.796575	1	7.575	0.816825	0.183175	1	6.9	0.8472	0.1528	1	6.15	0.88095	0.11905	1	8.325	0.783075	0.216925	1	11.625	0.634575	0.365425	0	6.375	0.870825	0.870825	0	8.175	0.789825	0.789825	0	6.3	0.8742	0.8742	1	6.075	0.884325	0.115675
103	1	10.95	0.66495	0.33505	0	8.55	0.77295	0.77295	1	8.925	0.756075	0.243925	1	7.425	0.823575	0.176425	1	7.35	0.82695	0.17305	1	9.6	0.7257	0.2743	1	11.025	0.661575	0.338425	0	7.65	0.81345	0.81345	0	9.45	0.73245	0.73245	0	7.575	0.816825	0.816825	1	7.35	0.82695	0.17305
104	0	8.7	0.7662	0.7662	0	7.575	0.816825	0.816825	1	7.2	0.8337	0.1663	1	6.525	0.864075	0.135925	1	5.7	0.9012	0.0988	0	7.875	0.803325	0.803325	1	10.05	0.70545	0.29455	0	5.925	0.891075	0.891075	1	7.725	0.810075	0.189925	0	5.85	0.89445	0.89445	1	5.625	0.904575	0.095425
105	0	9.9	0.7122	0.7122	1	8.025	0.796575	0.203425	0	6.9	0.8472	0.8472	0	6.15	0.88095	0.88095	1	5.4	0.9147	0.0853	0	7.575	0.816825	0.816825	0	5.4	0.9147	0.9147	0	5.625	0.904575	0.904575	0	7.425	0.823575	0.823575	0	5.55	0.90795	0.90795	1	9.68	0.7221	0.2779
106	0	11.1	0.6582	0.6582	0	8.475	0.776325	0.776325	1	7.875	0.803325	0.196675	1	7.35	0.82695	0.17305	1	6.6	0.8607	0.1393	1	8.775	0.762825	0.237175	1	13.2	0.5637	0.4363	0	6.825	0.850575	0.850575	0	8.625	0.769575	0.769575	0	6.75	0.85395	0.85395	0	10.63	0.67935	0.67935
107	0	5.7	0.9012	0.9012	0	5.325	0.918075	0.918075	0	5.1	0.9282	0.9282	1	4.2	0.9687	0.0313	1	4.275	0.965325	0.034675	0	5.625	0.904575	0.904575	1	10.05	0.70545	0.29455	0	3.675	0.992325	0.992325	0	5.475	0.911325	0.911325	0	3.6	0.9957	0.9957	1	8.75	0.76395	0.23605
108	0	8.775	0.762825	0.762825	1	6.15	0.88095	0.11905	1	5.775	0.897825	0.102175	1	4.95	0.93495	0.06505	1	4.275	0.965325	0.034675	1	6.45	0.86745	0.13255	0	5.625	0.904575	0.904575	0	4.5	0.9552	0.9552	0	6.3	0.8742	0.8742	0	4.425	0.958575	0.958575	1	4.2	0.9687	0.0313
109	1	10.95	0.66495	0.33505	0	9.825	0.715575	0.715575	1	7.95	0.79995	0.20005	1	7.275	0.830325	0.169675	1	6.45	0.86745	0.13255	0	8.625	0.769575	0.769575	0	6.3	0.8742	0.8742	0	6.675	0.857325	0.857325	0	7.725	0.810075	0.810075	0	6.6	0.8607	0.8607	1	8.56	0.7725	0.2275
110	0	7.2	0.8337	0.8337	0	6.075	0.884325	0.884325	1	5.7	0.9012	0.0988	0	4.95	0.93495	0.93495	1	4.2	0.9687	0.0313	1	6.375	0.870825	0.129175	0	7.05	0.84045	0.84045	0	4.425	0.958575	0.958575	0	6.225	0.877575	0.877575	0	4.35	0.96195	0.96195	1	4.125	0.972075	0.027925
111	0	10.95	0.66495	0.66495	0	9.9	0.7122	0.7122	1	7.65	0.81345	0.18655	1	7.2	0.8337	0.1663	0	6.45	0.86745	0.86745	0	8.625	0.769575	0.769575	0	9.3	0.7392	0.7392	0	6.675	0.857325	0.857325	1	8.475	0.776325	0.223675	0	6.6	0.8607	0.8607	1	6.375	0.870825	0.129175
112	0	11.55	0.63795	0.63795	0	7.35	0.82695	0.82695	0	9.075	0.749325	0.749325	1	7.8	0.8067	0.1933	1	6.225	0.877575	0.122425	1	9.225	0.742575	0.257425	0	7.65	0.81345	0.81345	0	7.275	0.830325	0.830325	0	9.075	0.749325	0.749325	1	7.2	0.8337	0.1663	0	6.975	0.843825	0.843825
113	0	10.575	0.681825	0.681825	0	8.775	0.762825	0.762825	1	8.55	0.77295	0.22705	1	7.65	0.81345	0.18655	1	6.9	0.8472	0.1528	0	9.075	0.749325	0.749325	1	11.7	0.6312	0.3688	1	7.125	0.837075	0.162925	0	8.925	0.756075	0.756075	0	7.05	0.84045	0.84045	1	6.825	0.850575	0.149425
114	0	6.375	0.870825	0.870825	0	5.925	0.891075	0.891075	1	6.6	0.8607	0.1393	1	4.875	0.938325	0.061675	1	4.125	0.972075	0.027925	0	6.3	0.8742	0.8742	1	13.05	0.57045	0.42955	0	4.35	0.96195	0.96195	1	6.15	0.88095	0.11905	0	4.275	0.965325	0.965325	0	9.64	0.7239	0.7239
115	0	5.2	0.9237	0.9237	0	4.6	0.9507	0.9507	1	4.525	0.954075	0.045925	0	4.15	0.97095	0.97095	1	3.7	0.9912	0.0088	1	4.875	0.938325	0.061675	0	4.725	0.945075	0.945075	0	3.925	0.981075	0.981075	0	4.725	0.945075	0.945075	0	3.85	0.98445	0.98445	1	7.56	0.8175	0.1825
116	1	10.2	0.6987	0.3013	0	9.825	0.715575	0.715575	1	6.45	0.86745	0.13255	1	6.525	0.864075	0.135925	1	5.775	0.897825	0.102175	0	7.875	0.803325	0.803325	0	5.55	0.90795	0.90795	0	5.925	0.891075	0.891075	0	7.725	0.810075	0.810075	0	5.85	0.89445	0.89445	1	5.625	0.904575	0.095425
117	0	9.9	0.7122	0.7122	0	8.025	0.796575	0.796575	1	7.65	0.81345	0.18655	1	6.9	0.8472	0.1528	1	6.15	0.88095	0.11905	0	8.325	0.783075	0.783075	0	6.9	0.8472	0.8472	0	6.375	0.870825	0.870825	0	8.175	0.789825	0.789825	0	6.3	0.8742	0.8742	1	8.51	0.77475	0.22525
118	0	10.2	0.6987	0.6987	0	8.4	0.7797	0.7797	1	7.125	0.837075	0.162925	1	6.375	0.870825	0.129175	1	5.7	0.9012	0.0988	0	7.875	0.803325	0.803325	0	6.3	0.8742	0.8742	0	5.925	0.891075	0.891075	0	7.725	0.810075	0.810075	0	5.85	0.89445	0.89445	1	5.625	0.904575	0.095425
119	0	5.775	0.897825	0.897825	0	6.9	0.8472	0.8472	1	7.275	0.830325	0.169675	1	6.525	0.864075	0.135925	1	5.775	0.897825	0.102175	1	7.95	0.79995	0.20005	0	11.625	0.634575	0.634575	0	6	0.8877	0.8877	0	7.8	0.8067	0.8067	0	5.925	0.891075	0.891075	0	5.7	0.9012	0.9012
120	0	7.95	0.79995	0.79995	0	6.6525	0.858337	0.858337	1	6.975	0.843825	0.156175	1	6.15	0.88095	0.11905	1	4.65	0.94845	0.05155	0	6.9	0.8472	0.8472	0	6.075	0.884325	0.884325	0	4.95	0.93495	0.93495	0	6.75	0.85395	0.85395	0	4.875	0.938325	0.938325	1	7.56	0.8175	0.1825
